# Supplementary material
Source: PubMed Central journal article supplement (PMC2710825)

## **Supplementary Figure legends:**

**Supplementary Figure 1. Relative contribution of persistent CCPs and overall CCP density after protein depletion.** **A**, Relative contributions of persistent CCPs after specific protein depletion. The ten here studied proteins have been color-coded according to their classification as shown in Figure 6. \*\*\* indicate confidence levels of  $p < 10^{-6}$ . **B**, CCP density is not significantly affected by specific protein depletion.

**Supplementary Figure 2. Depletion of endocytic accessory proteins by siRNA.** BSC1 cells were transfected twice with the respective siRNA oligos. 72h after the first transfection, cells were lysed and silencing efficiency was revealed by Western Blot. Different dilutions of total cell lysates were loaded as indicated. Actin or dynamin served as loading controls and the percentage of silencing efficiency was determined as described in Methods.

**A**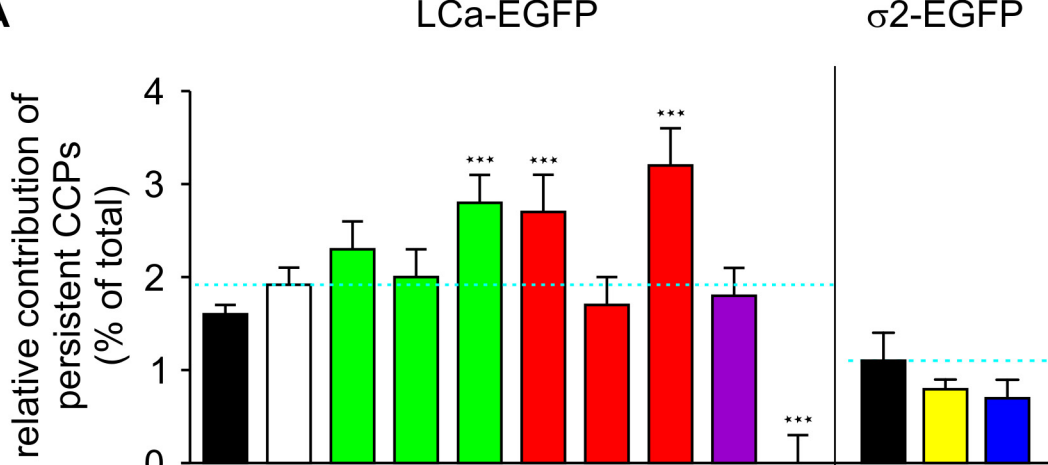**B**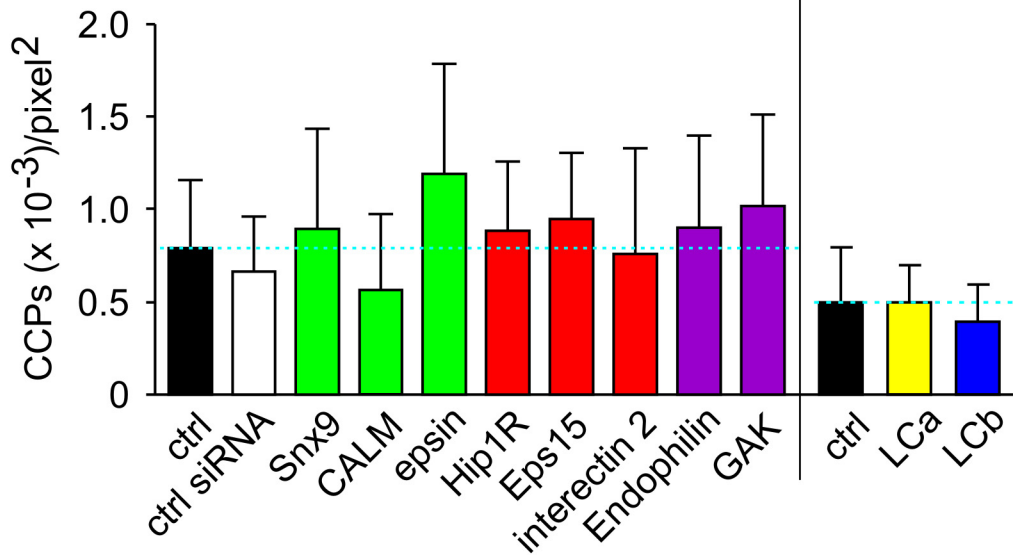

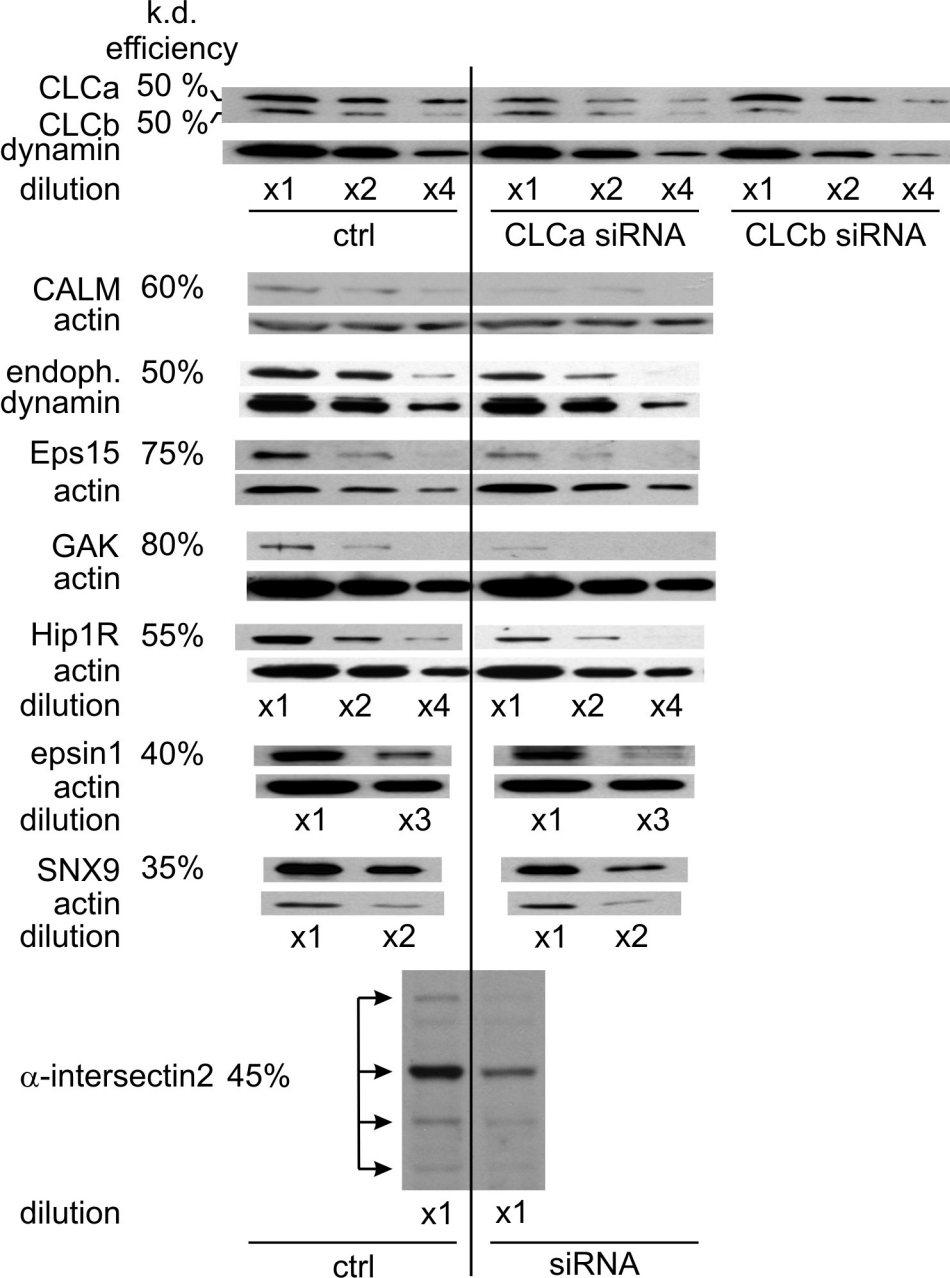

Supplement: E09-03-0256_1.pdf [file E09-03-0256_1.pdf]
